# Supplementary material for: GalNac-modified red blood cell-derived extracellular vesicles protect against liver diseases
Source: Research Square preprint supplement (doi:10.21203/rs.3.rs-3834825/v1), 2024-02-02
Supplement: Supplementary file 1 [file e18b8960bf10f951be0016d0.docx]

Supplementary files：

GalNac-modified red blood cell-derived extracellular vesicles protect against liver diseases


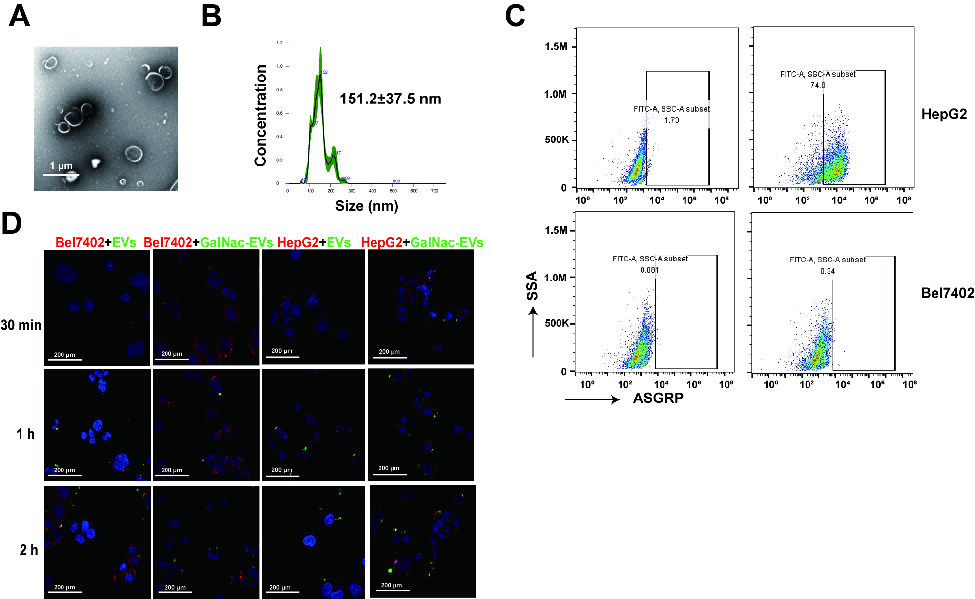


**Fig. S1. GalNac-modified RBC-EVs specifically targeted hepatocytes by binding to ASGPR. (*A*)** Representative TEM images showingRBC-EVs decorated by GalNac-miRNA (GalNac-RBC-EVs). Scale bars, 1 μm. **(*B*)** Size distribution of GalNac-RBC-EVs as measured by NTA. **(*C*)** Flow cytometry plots showing surface expression of ASGPR on the HepG2 and Bel7402 cells. **(*D*)** Representative images showing the uptake of CFSE-labeled (green)RBC-EVs and GalNac-RBC-EVs by HepG2 (red) and Bel7402 (red) cells after 30 min, 1 h or 2 h of incubation. **P <*0.05, ***P <*0.01, ****P <*0.001 and *****P <*0.0001*.*TEM: transmission electron microscopy, NTA: nanoparticle tracking analysis.
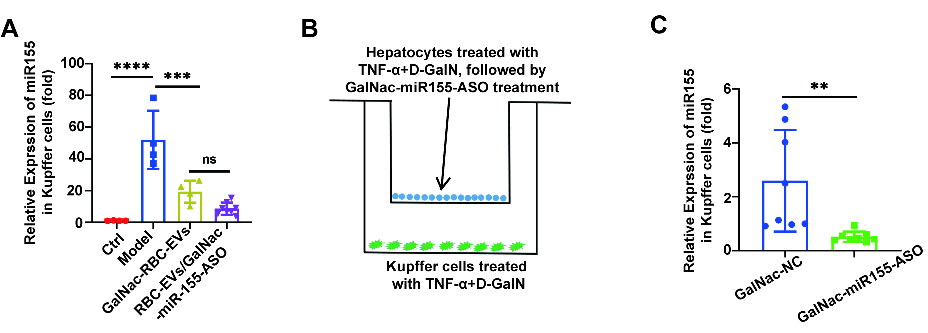


**Fig. S2. RBC-EVs/GalNac-miR-155-ASO reduced miR-155 expression in Kupffer cells. (*A*)** The ALF model was induced in six-weeks-old male C57BL/6J mice using D-GalN/LPS, and the mice were intravenously injected with GalNac-miR-155-ASO (0.64 OD) or RBC-EVs/GalNac-miR-155-ASO (5 mg/kg). The control (Ctrl) group received PBS. The figure shows the relative expression levels of miR-155 in the Kupffer cells from different groups. **(*B*)** Kupffer cells and hepatocytes were stimulated with TNF-α and D-GaIN for 12 h, and the hepatocytes transfected with GalNac-miR155-ASO were co-cultured with Kupffer cells in a transwell plate (0.4 μm). (***C***) Relative expression levels of miR-155 in the co-cultured Kupffer cells after 48 h. Data are shown as mean ± SD. ns, no significant, **P <*0.05, ***P <*0.01, ****P <*0.001 and *****P <*0.0001*.*


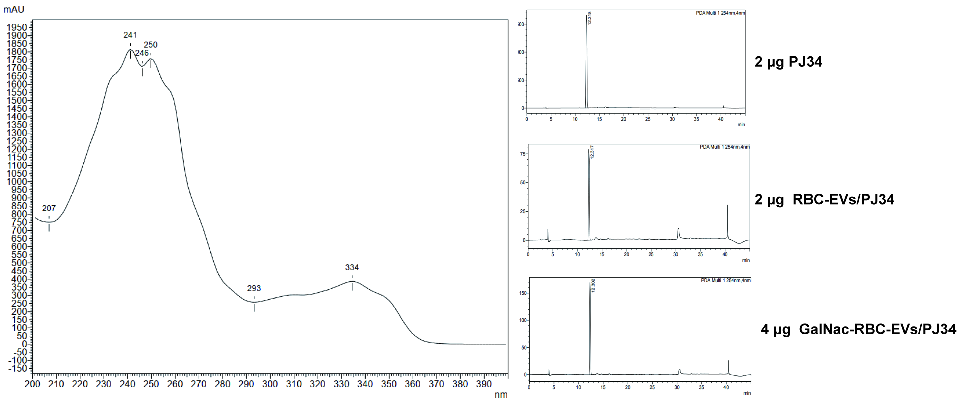


**Fig. S3. PJ34 was quantified by HPLC.** Representative results of HPLC for 2 μg PJ34 standard, 2 μg RBC-EVs/PJ34 and 4 μg GalNac-RBC-EVs/PJ34. HPLC: high-performance liquid chromatography.


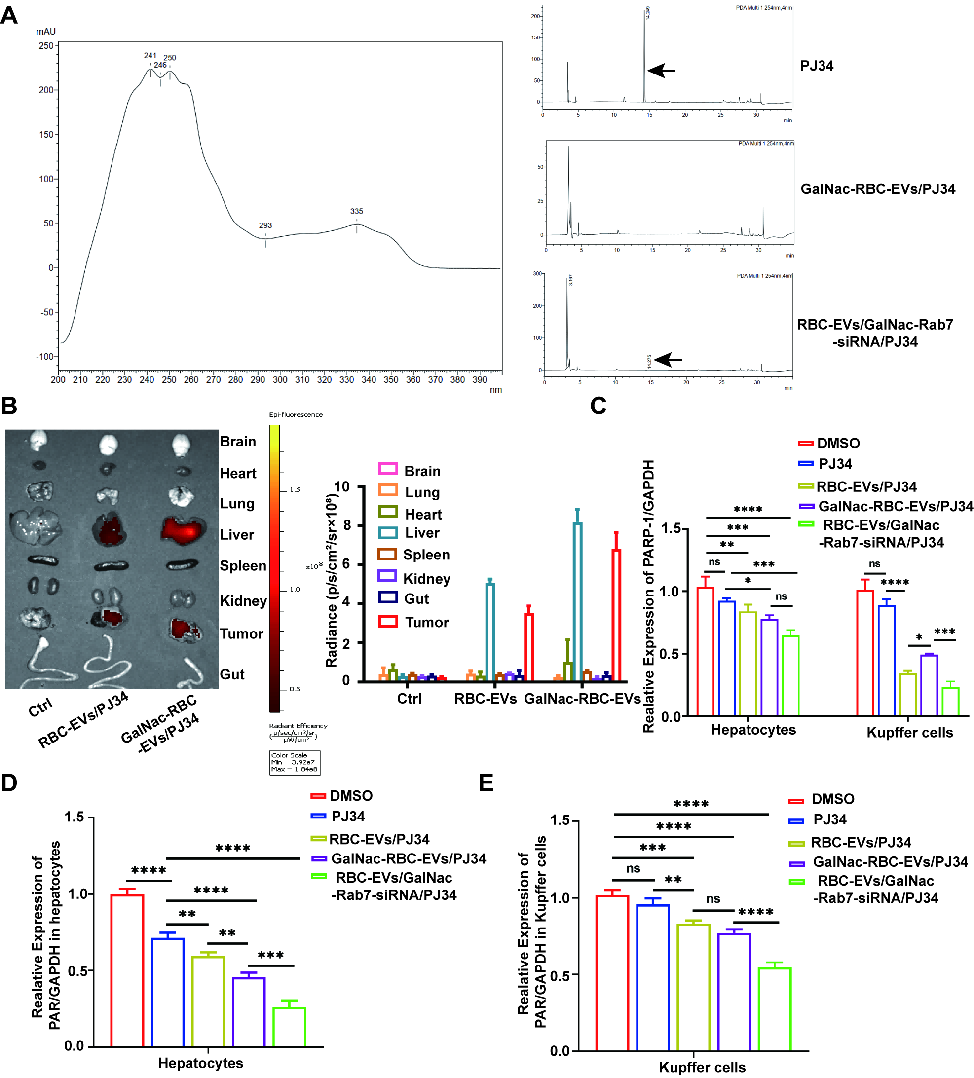


**Fig. S4.** **RBC-EVs/GalNac-Rab7-siRNA/PJ34 decreased Rab7 and PARP-1 expression in hepatocytes.** **(*A*)** Concentration of PJ34 in the cytosol of Hepa1-6 cells treated with GalNac-RBC-EVs/PJ34 and RBC-EVs/GalNac-Rab7-siRNA/PJ34 for 24 h. PJ34 levels were quantified by HPLC. **(*B*)** Representative images and fluorescence intensities of organs extracted from C57BL/6J mice 24 h after intravenous injection of VivoTrack 680-labelled RBC-EVs/PJ34 and GalNac-RBC-EVs/PJ34. **(*C*)** PARP-1 expression in hepatocytes and Kupffer cells, data are representative of three independent experiments. **(*D*)** PAR expression in the primary hepatocytes, data are representative of three independent experiments. **(*E*)** PAR expression in the Kupffer cells, data are representative of three independent experiments. **P <*0.05, ***P <*0.01, ****P <*0.001 and *****P <*0.0001*.*HPLC: high-performance liquid chromatography.


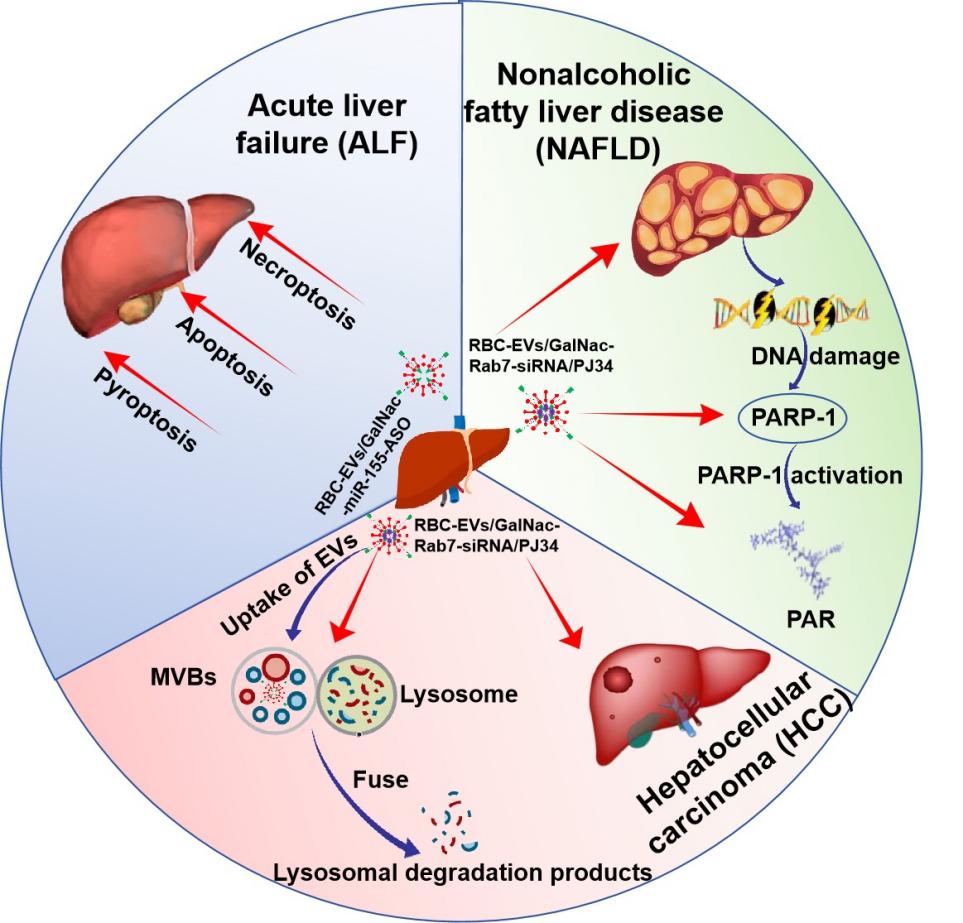


**Fig. S5:** **Schematic diagram of GalNac-modified RBC-EVs for the treatment of liver diseases**. RBC-EVs/GalNac-miR-155-ASO protect mice against ALF by suppressing pyroptosis, apoptosis and necroptosis. RBC-EVs/GalNac-Rab7-siRNA/PJ34 alleviateNAFLD and HCC by inhibiting PARP-1 expression and activity. In addition, inactivation of Rab7 decreases the fusion of multiple vesicle bodies (MVBs) and lysosomes, and subsequently decreases the degradation of PJ34.

**Supplementary Table 1: Sequences used in this article**

| **Sequence for anti-miR-155 ASO** | |
| --- | --- |
| **miR-155 ASO** | 5’-ACCCCUAUCACAAUUAGCAUUAA-3’ |
| **miR-NC-ASO** | 5’-CAGUACUUUUGUGUAGUACAA-3’ |
| **Primers for real-time PCR** | |
| ***mGAPDH* F** | 5’-AGGTCGGTGTGAACGGATTTG-3’ |
| ***mGAPDH* R** | 5’-TGTAGACCATGTAGTTGAGGTCA-3’ |
| ***mmiR-155* F** | 5’-CGGCGGTTAATGCTAATTGTGAT-3’ |
| ***mmiR-155* R** | 5’-GTGCAGGGTCCGAGGT-3’ |
| ***mU6* F** | 5’-CAGCACATATACTAAAATTGGAACG-3’ |
| ***mU6* R** | 5’-ACGAATTTGCGTGTCATCC-3’ |
| **Sequences for siRNA** | |
| ***siRNA Rab7 F*** | 5’-GCGGCAGUAUUCUGUACAGUATT-3’ |
| ***siRNA Rab7* R** | 5’-UACUGUACAGAAUACUGCCTCTT-3’ |
| **NC *siRNA* F** | 5’-UUCUCCGAACGUGUCACGU-3’ |
| **NC *siRNA* R** | 5’-ACGUGACACGUUCGGAGAA-3’ |

**Supplementary Table 2: The antibodies for** **immunofluorescence, immunohistochemistry, immunoblotting and flow cytometry**

| **Antibodies** | **Source** | **Identifier** | **Dilution ratio** |
| --- | --- | --- | --- |
| **ASGRP** | Abcam | ab254262 | 1: 200 |
| **F4/80** | Abcam | ab300421 | 1: 200 |
| **LAMP1** | Abcam | ab208943 | 1: 200 |
| **MPO** | Abcam | Ab208670 | 1: 200 |
| **CD9** | ABclonal | A19027 | 1: 1000 |
| **CD81** | ABclonal | A5270 | 1: 1000 |
| **GRP94** | ABclonal | A0989 | 1: 1000 |
| **Hemoglobin A1** | ABclonal | A7322 | 1: 1000 |
| **Tsg101** | ABclonal | A2216 | 1: 1000 |
| **Alix** | ABclonal | A2215 | 1: 1000 |
| **GSDME** | Huabio | ER1901-12 | 1: 1000 |
| **NLRP3** | Cell Signaling Technology (CST) | 15101 | 1: 1000 |
| **Cleaved Caspase-3** | CST | 9661 | 1: 1000 |
| **Cleaved Caspase-7** | Abcam | Ab256469 | 1: 1000 |
| **Cleaved Caspase-8** | CST | 8592 | 1: 1000 |
| **Bcl-2** | Huabio | ET1702-53 | 1: 1000 |
| **Bax** | Huabio | ET1603-34 | 1: 1000 |
| **P-RIP** | CST | 53286 | 1: 1000 |
| **RIP** | CST | 3493 | 1: 1000 |
| **P-RIP3** | CST | 91702 | 1: 1000 |
| **RIP3** | CST | 15828 | 1: 1000 |
| **P-MLKL** | CST | 37333 | 1: 1000 |
| **MLKL** | CST | 37705 | 1: 1000 |
| **Rab7** | ABclonal | A12784 | 1: 1000 |
| **HMGB1** | ABclonal | A2553 | 1: 1000 |
| **PARP-1** | Abcam | ab227244 | 1: 1000 |
| **Poly/Mono-ADP Ribose** | CST | E6F6A | 1: 1000 |
| **GAPDH** | Huabio | ET1601-4 | 1: 1000 |
| **goat anti-rabbit (HRP)** | MultiScience | GAR007 | 1: 5000 |
| **goat anti-Rabbit (Alexa Fluor 488)** | Abcam | ab150077 | 1: 200 |
| **goat anti-mouse (HRP)** | MultiScience | GAM0072 | 1: 5000 |
